# Supplementary material for: miRNA-199a-5p/SLC2A1 axis regulates glucose metabolism in non-small cell lung cancer
Source: PubMed Central journal article supplement (PMC9066207; doi:10.7150/jca.67990), 2022-04-18
Supplement: jcav13p2352s1.pdf [file jcav13p2352s1.pdf]

**Table 1: Details of 41 NSCLC patients donating tissue samples**

| No. | Age | Gender | Histologic Type                     | pTNM   |
|-----|-----|--------|-------------------------------------|--------|
| 1   | 54  | F      | Adenocarcinoma                      | T2N2M0 |
| 2   | 64  | M      | Squamous cell carcinoma             | T2N1M0 |
| 3   | 49  | M      | Adenocarcinoma                      | T2N0M0 |
| 4   | 73  | M      | Adenocarcinoma                      | /      |
| 5   | 60  | M      | Adenocarcinoma                      | T4N0M0 |
| 6   | 72  | M      | Adenocarcinoma                      | T2N2M0 |
| 7   | 40  | M      | Adenocarcinoma                      | T1N1M0 |
| 8   | 66  | M      | Adenocarcinoma                      | T2N2M0 |
| 9   | 67  | M      | Adenocarcinoma                      | T2N0M0 |
| 10  | 67  | F      | Adenocarcinoma                      | T2N0M0 |
| 11  | 76  | M      | Squamous cell carcinoma             | T2N0M0 |
| 12  | 80  | F      | Adenocarcinoma                      | T1N0M0 |
| 13  | 40  | F      | Adenocarcinoma                      | T2N2M0 |
| 14  | 76  | F      | Adenocarcinoma                      | T1N0M0 |
| 15  | 72  | M      | Large-Cell Neuroendocrine Carcinoma | T2N2M0 |
| 16  | 67  | M      | Squamous cell carcinoma             | T2N2M0 |
| 17  | 58  | M      | Adenocarcinoma                      | T2N0M0 |
| 18  | 49  | M      | Adenocarcinoma                      | T2N0M0 |
| 19  | 54  | M      | Squamous cell carcinoma             | T1N0M0 |
| 20  | 60  | F      | Adenocarcinoma                      | T2N0M0 |
| 21  | 77  | F      | Squamous cell carcinoma             | T2N1M0 |
| 22  | 51  | M      | Squamous cell carcinoma             | T1N1M0 |

|    |    |   |                         |        |
|----|----|---|-------------------------|--------|
| 23 | 75 | M | NSCLC                   | T1N2M0 |
| 24 | 66 | M | Adenocarcinoma          | T1N0M1 |
| 25 | 63 | M | Squamous cell carcinoma | T2N1M0 |
| 26 | 59 | M | Squamous cell carcinoma | T2N2M0 |
| 27 | 75 | M | Adenocarcinoma          | T1N0M0 |
| 28 | 47 | F | Adenocarcinoma          | T1N2M0 |
| 29 | 64 | M | Adenocarcinoma          | T2N0M0 |
| 30 | 66 | M | Adenocarcinoma          | T2N0M0 |
| 31 | 68 | M | Adenocarcinoma          | T2N0M0 |
| 32 | 58 | M | Adenocarcinoma          | T2N0M0 |
| 33 | 78 | M | Adenocarcinoma          | T2N0M0 |
| 34 | 74 | F | NSCLC                   | T2N2M0 |
| 35 | 65 | M | Adenocarcinoma          | T2N0M0 |
| 36 | 56 | F | Adenocarcinoma          | T1N2M0 |
| 37 | 59 | M | NSCLC                   | T2N2M0 |
| 38 | 38 | M | Adenocarcinoma          | T2N0M0 |
| 39 | 44 | F | Adenocarcinoma          | T2N1M0 |
| 40 | 68 | F | Adenocarcinoma          | T2N0M0 |
| 41 | 74 | M | Squamous cell carcinoma | T2N1M0 |

**Table 2: Details of primer sequences**

| <b>Primer Name</b> | <b>Primer Sequence (5'-3')</b> |
|--------------------|--------------------------------|
| U6 snRNA(F)        | CTCGCTTCGGCAGCACA              |
| U6 snRNA(R)        | AACGCTTCACGAATTTGCGT           |
| 18S RNA(F)         | CTCGTTCGGCAGCACA               |
| 18S RNA(R)         | GCCTCACTAAACCATCCAA            |
| miR-199a-5p qRT    | CCCAGTG TTCAGACTACCTGTTC       |
| SLC2A1 3'-UTR(F)   | GGGAGCTCAGCAGTGCAGGGAGGAGAGG   |
| SLC2A1 3'-UTR(R)   | GCACTGCTGAGCTCCCAACTGGTCTCAG   |
| SLC2A1 qRT(F)      | CAGATGATGCGGGAGAAGAA           |
| SLC2A1 qRT(R)      | CCAAAGCGGTAAACGAAAAGG          |
